# Supplementary material
Source: PubMed Central journal article supplement (PMC7502712)
Supplement: pnas.2010545117.sapp.pdf [file pnas.2010545117.sapp.pdf]

# PNAS

[www.pnas.org](http://www.pnas.org)

Supplementary Information for

Human  $\gamma\delta$  T cells recognize CD1b by two distinct mechanisms

Josephine F. Reijneveld, Tonatiuh A. Ocampo, Adam Shahine, Benjamin S. Gully, Pierre Vantourout, Adrian C. Hayday, Jamie Rossjohn, D. Branch Moody, Ildiko Van Rhijn

Corresponding author: Ildiko Van Rhijn  
Email: [i.vanrhijn@uu.nl](mailto:i.vanrhijn@uu.nl)

**This PDF file includes:**

Figures S1 to S7  
Table S1

Fig. S1

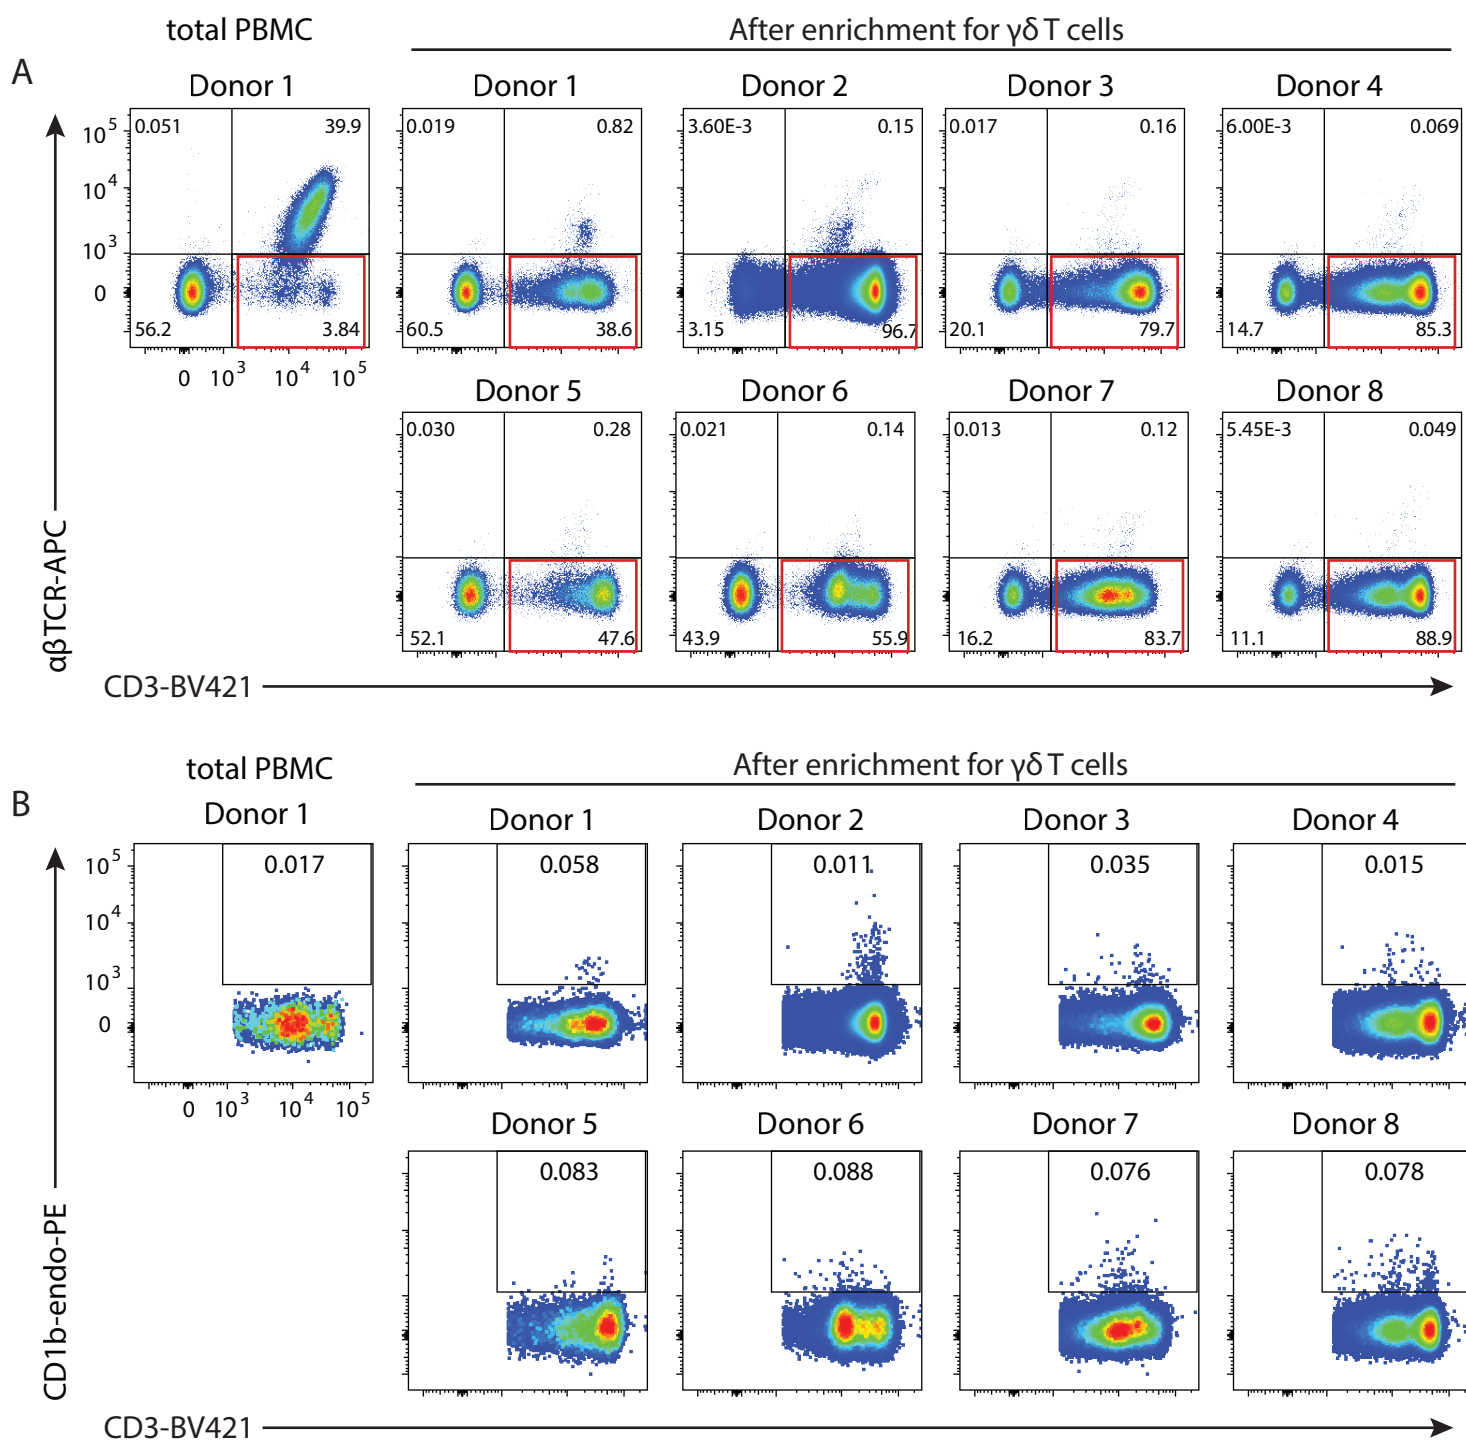

**Figure S1. Ex vivo staining of  $\gamma\delta$  T cells.** **a** Flow cytometry dot plots showing gating on  $\gamma\delta$  T cells in red rectangle (CD3<sup>+</sup>αβTCR<sup>-</sup> cells) **b** Flow cytometry dot plots showing CD1b-endo tetramer staining on  $\gamma\delta$  T cells enriched from PBMC from 8 donors by column purification (gated on CD3<sup>+</sup>αβTCR<sup>-</sup> cells).

Fig. S2

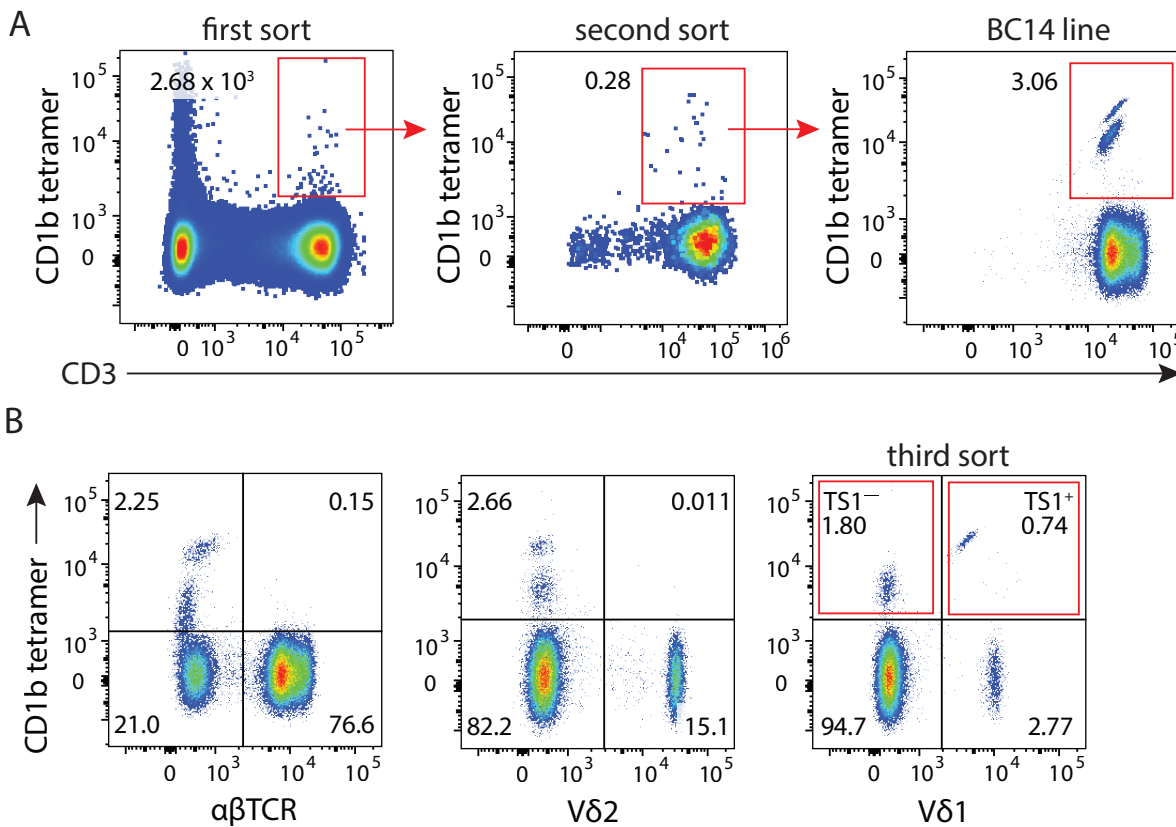

**Figure S2. Generation of CD1b-endo recognizing  $\gamma\delta$  T cell lines.** **a** CD1b-tetramer<sup>+</sup>CD3<sup>+</sup> PBMCs from Buffy Coat 14 (BC14) were sorted, followed by expansion in vitro for 14 days and another round of sorting and expansion. The resulting line was called “BC14”. Staining of CD3<sup>-</sup> cells in PBMC is thought to reflect aspecific binding to dead or dying cells or binding to an unknown receptor other than the TCR. **b** Flow cytometry dot plots of line BC14 stained with CD1b tetramer and antibodies against the  $\alpha\beta$  TCR, V $\delta$ 1, or V $\delta$ 2. Populations in outlined red areas were sorted generating lines TS1<sup>+</sup> and TS1<sup>-</sup>.

Fig. S3

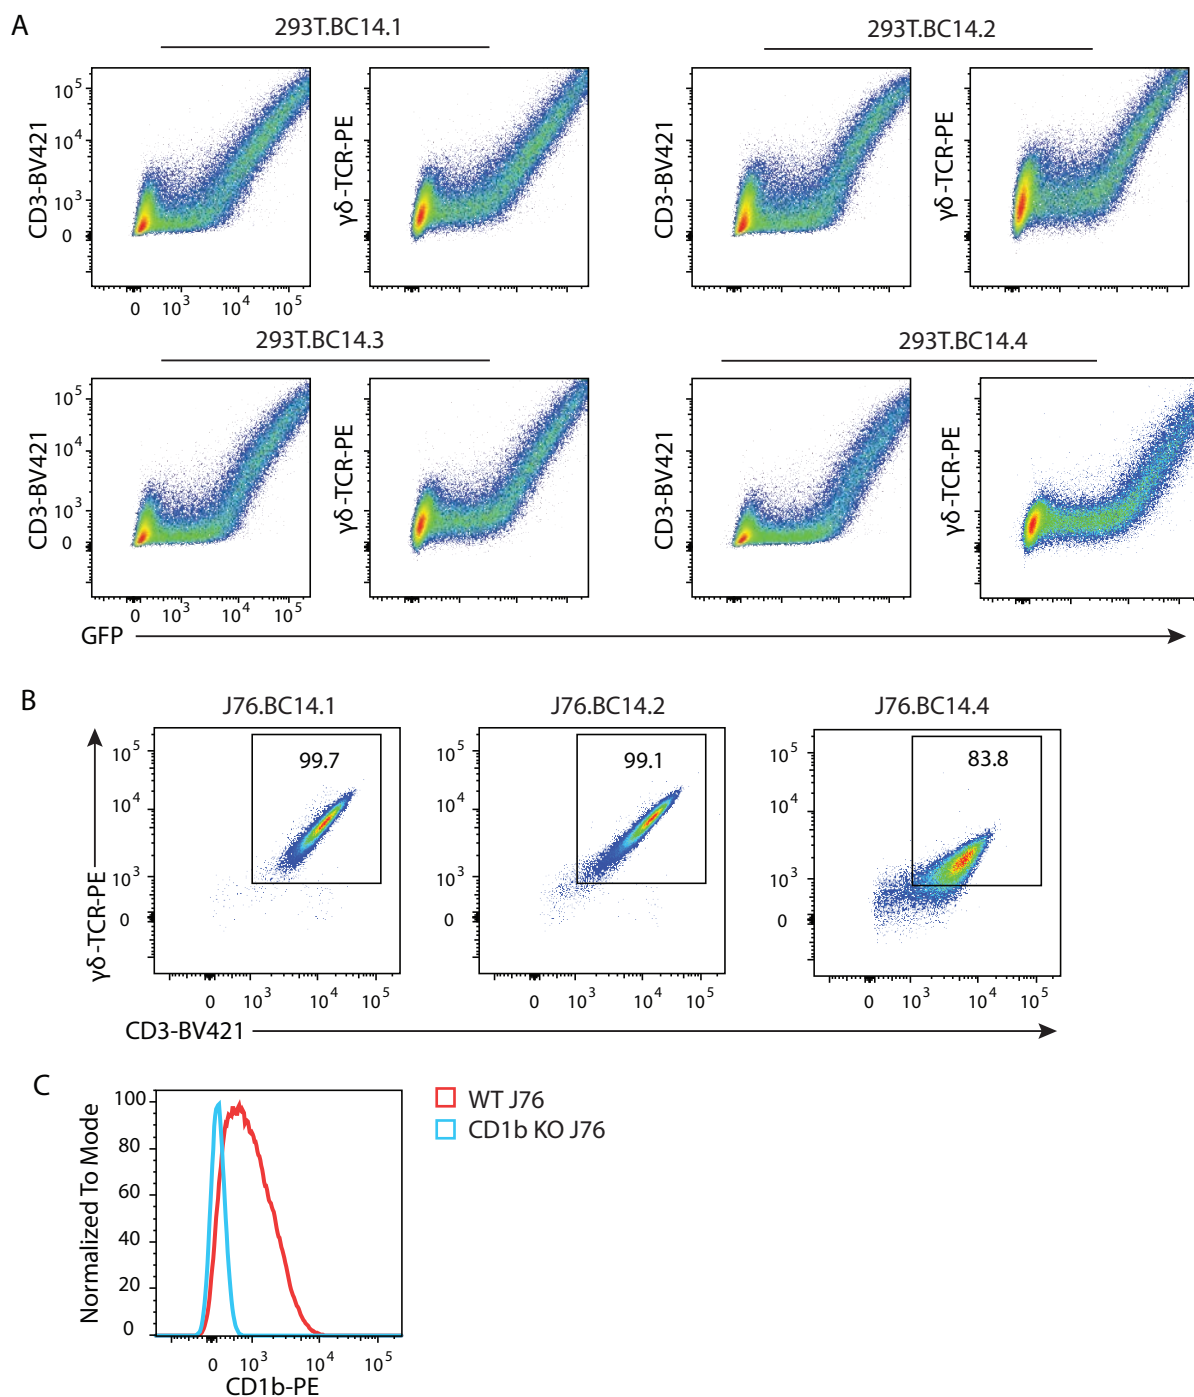

**Figure S3. TCR transfer and CD1b knock out.** **a** Flow cytometry dot plots showing TCR and CD3 expression versus GFP expression by 293T cells transfected with  $\gamma\delta$  TCRs and CD3 subunits. **b** Flow cytometry dot plots showing cell surface expression of CD3 and TCR (using a “pan  $\gamma\delta$  TCR” antibody) of the stable J76.BC14.1, J76.BC14.2, and J76.BC14.4 cell line. **c** Flow cytometry histograms showing CD1b expression of WT Jurkat76 and Jurkat76 cells where CD1b was knocked out (KO).

Fig. S4

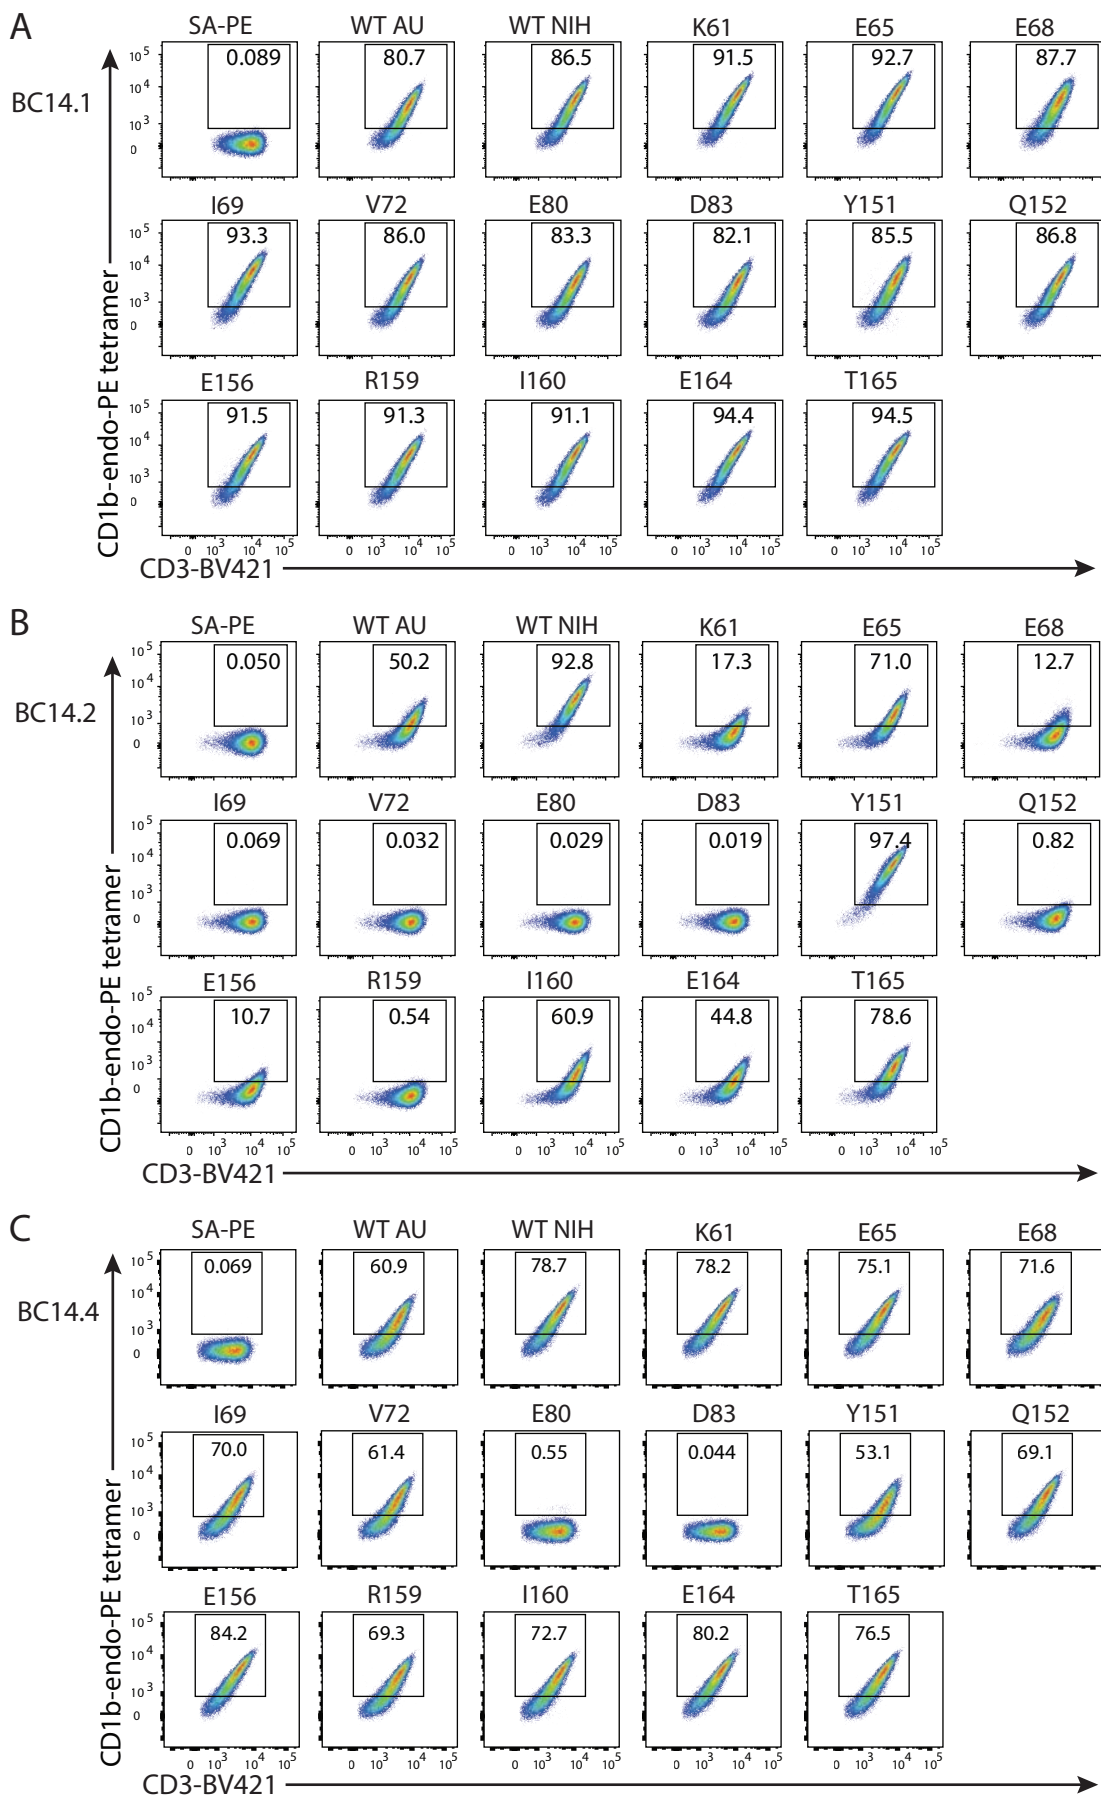

**Figure S4. Staining patterns transduced Jurkat76 lines.** a-c Flow cytometry dot plots of J76.BC14.1 (a), J76.BC14.2 (b), and J76.BC14.4 (c) showing binding of CD1b-endo tetramers with the indicated point mutations and WT CD1b-endo tetramers. WT AU: WT tetramers created in parallel with the mutant tetramers, using the same expression platform. WT NIH: WT tetramers obtained from the NIH tetramer facility.

Fig. S5

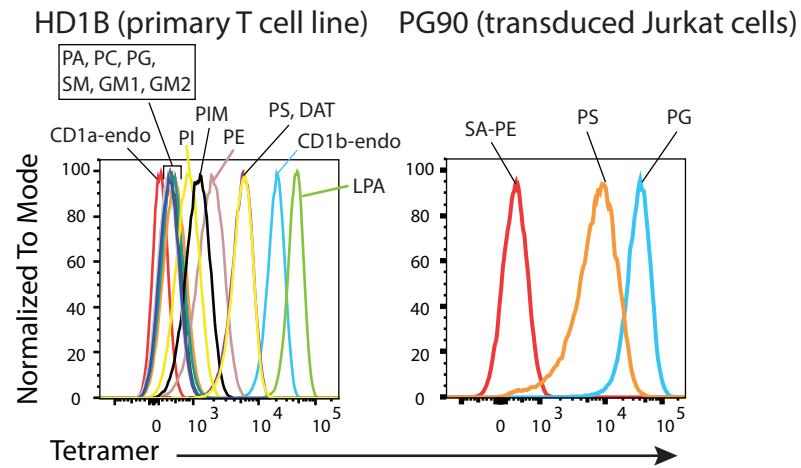

**Figure S5. Control staining for tetramer panel treated with self and bacterial lipids.** a Flow cytometry histograms showing binding of tested tetramers by cell lines HD1B (T cell line) and PG90 (Jurkat cell line), two  $\alpha\beta$  TCRs with known lipid reactivity pattern.

Fig. S6

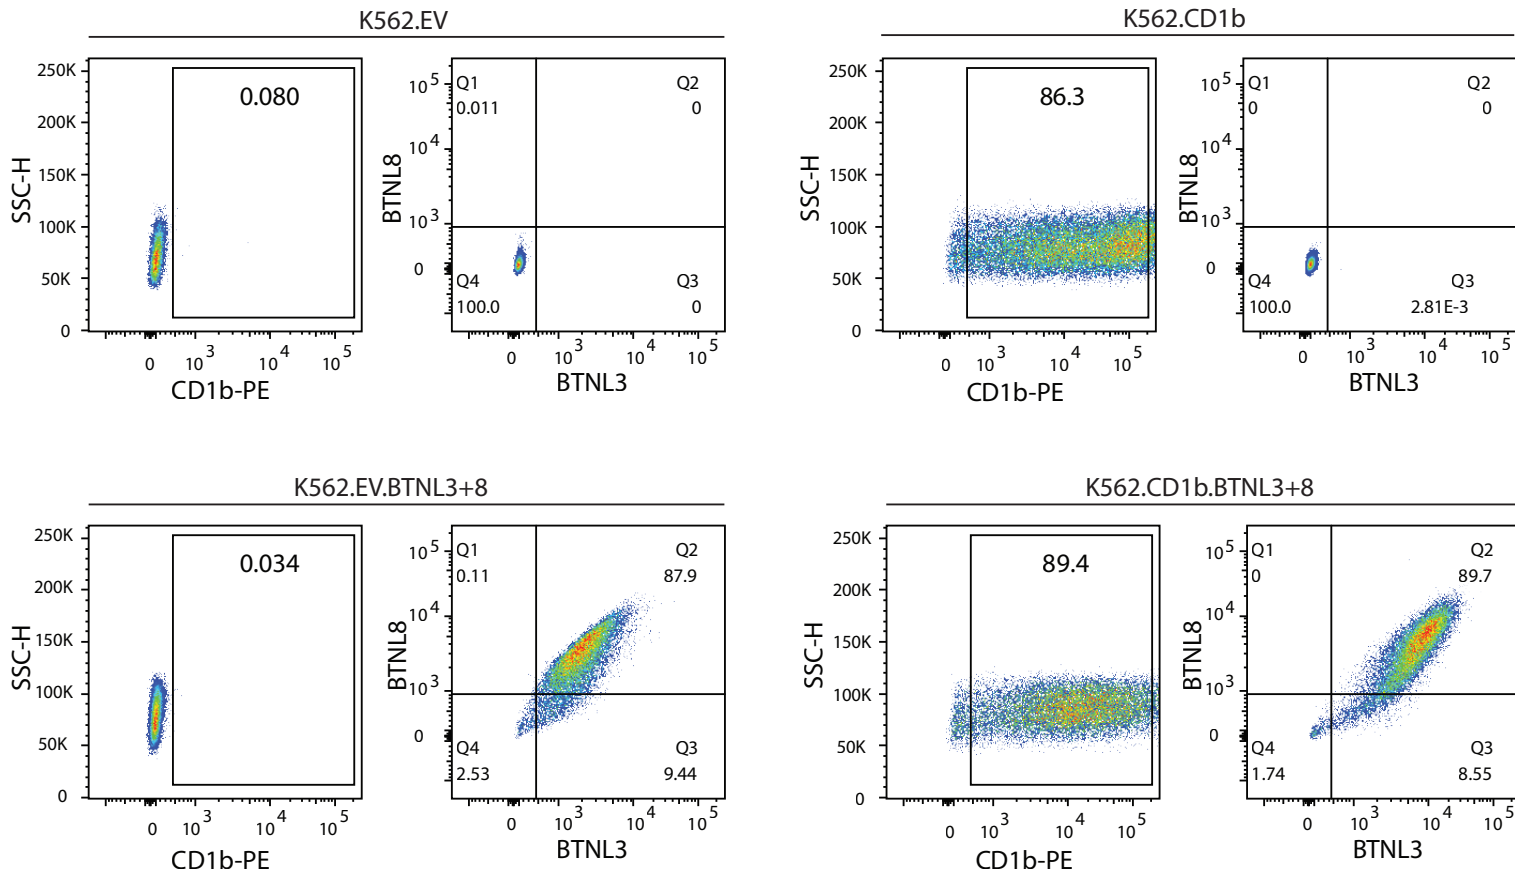

**Figure S6. BTNL expression by transduced K652 cells.** Flow cytometry dot plots showing expression of CD1b, BTNL3, and BTNL8 by the transduced K562 cell lines.

Fig. S7

```

                                CDR1                                CDR2                                CDR3
TRGV4*01  SSNLEGRTKSVIRQTGSSAEITCDLA--EGSTGYIHWYLHQEGKAPQRLLYYDSYTSVVLESGLSPGKYDTHY-GSTRKNLRMLRNLIENDSGVYYCATWDG
TRGV2*01  SSNLEGRTKSVIRQTGSSAEITCDLA--EGSNGYIHWYLHQEGKAPQRLQYYSYNSKVVLESGLSPGKYTY-ASTRNLRLLILRNLIENDSGVYYCATWDG
TRGV3*01  SSNLEGRTKSVIRQTGSSAEITCDLT--VTNTFYIHWYLHQEGKAPQRLLYYDVSTARDVLESGLSPGKYTH-TPRRWSWILRLQNLIENDSGVYYCATWDR
TRGV5*01  SSNLEGRTKSVTRPTRSSAEITCDLT--VINAFYIHWYLHQEGKAPQRLLYYDVSNKDVLESGLSPGKYTH-TPRRWSWILILRNLIENDSGVYYCATWDR
TRGV8*01  SSNLEGRTKSVTRPTGSSAVITCDLP--VENAVYTHWYLHQEGKAPQRLLYYDSYNSRVVLESGLSREKYHTY-ASTKSLKFIENLIENDSGVYYCATWDR
TRGV9*01  AGHLEQPQISSTKTLKTKARLECVVSGITISATSVYWYRERPEVIQ-FLVVISYDGTVRKESGIPSGKFEVDRIPESTSTLTIHNVKQDIATYYCALWEV
: : **      *  :  : * : * : .      .      : **  : * : * :      .      * * * : . * : . . . : : * : : * . * * * * * :

```

**Figure S7. TRGV sequence alignment.** Alignment of the amino-acid sequences of human TCR V $\gamma$  chains. Red font: divergence from V $\gamma$ 4; asterisks (\*): identical residues; periods (.): semi-conserved residues; colons (:): conserved residues (following the standard ClustalW designations for amino acid comparisons). Colored highlights indicate variable regions (CDR1: green; CDR2: yellow; CDR3: blue).



Supplementary table

| Publication     | Clone   | Restriction + antigen | TCR $\gamma$ |      |                    |
|-----------------|---------|-----------------------|--------------|------|--------------------|
|                 |         |                       | TRGV         | TRGJ | CDR3 $\gamma$      |
| Bai 2012 EJI    | DP10.7  | CD1d-sulfatide        | GV4          | GJ1  | CATWDEKYYKKLF      |
| Roy 2016 JI     | 22.4    | CD1c-PM               | GV2          | GJ1  | CATWDLIKKLFSG      |
| Roy 2016 JI     | 12.9-2  | CD1c-PM               | GV8          | GJ2  | CATWDVESYKKLFGSG   |
| Roy 2016 JI     | 12.16-3 | CD1c-PM               | GV3          | GJP2 | CATWDRRSDWIKTFAKG  |
| Uldrich 2013 NI | 9C2     | CD1d-a-GalCer         | GV5          | GJ1  | CATWDRGNPKTHYYKKLF |
| Uldrich 2013 NI | 6       | CD1d-a-GalCer         | GV9          | GJ1  | CALWEARPFYKKLF     |

**Table S1. Published V $\gamma$  sequences from CD1-specific TCRs used for designing modified BC14.1 TCRs**
